# Supplementary material for: Grazing enhances species diversity in grassland communities
Source: PubMed Central journal article supplement (PMC6671982; doi:10.1038/s41598-019-47635-1), 2019-08-01
Supplement: 41598_2019_47635_MOESM1_ESM.pdf [file 41598_2019_47635_MOESM1_ESM.pdf]

## **SUPPLEMENTARY MATERIALS**

**Title: Grazing enhances species diversity in grassland communities**

**Short title: Grazing enhances biodiversity in grasslands**

Muhammad Almaududi Pulungan<sup>1,\*</sup>, Shota Suzuki<sup>5</sup>, Maica Krizna Areja Gavina<sup>1,2</sup>, Jerrold M. Tubay<sup>2</sup>, Hiromu Ito<sup>3,4</sup>, Momoka Nii<sup>5</sup>, Genki Ichinose<sup>1</sup>, Takuya Okabe<sup>5</sup>, Atsushi Ishida<sup>6</sup>, Masae Shiyomi<sup>7</sup>, Tatsuya Togashi<sup>9</sup>, JinYoshimura<sup>1,8,9,\*</sup>, Satoru Morita<sup>1,\*</sup>

### **Contents:**

**Supplementary Figures 1-5**

**Supplementary Table 1**

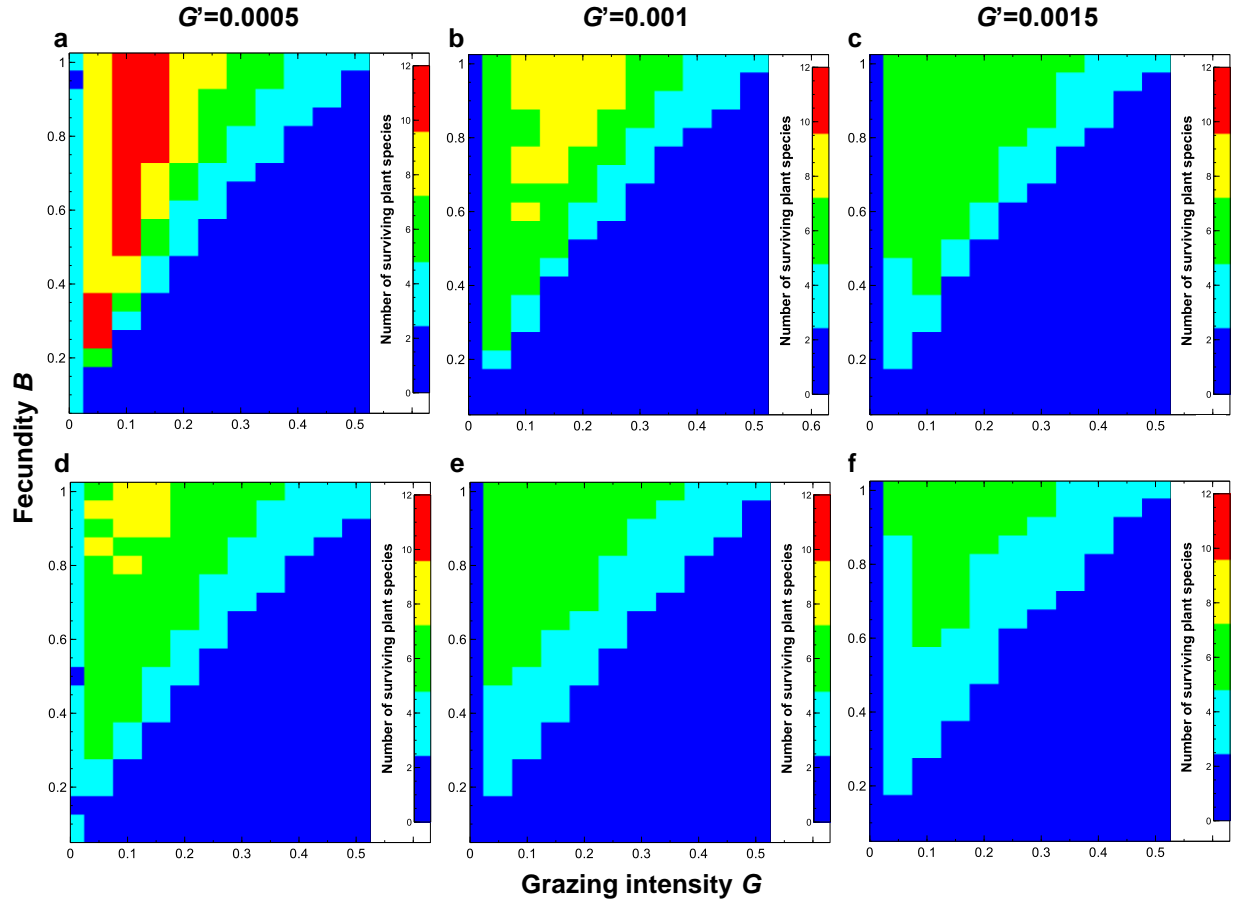

**Supplementary Figure 1.** The average number of surviving species as a function of the basal grazing intensity  $G$  and basal fecundity  $B$  for three values of interspecific grazing differences ( $G'$ ). **a-c** The grazing intensity of a species increases as the fecundity increases, i.e.,  $g_i = G + G'(20 - i)$  and  $B_i = B - 0.002(i - 1)$  for  $i = 1, 2, \dots, s$ , indicating a trade-off between the birth rate and grazing intensity of a species. **d-f** The grazing rate decreases as the fecundity increases, i.e.,  $g_i = G + G'(i - 1)$  and  $B_i = B - 0.002(i - 1)$  for  $i = 1, 2, \dots, s$ , indicating that inferior species are eaten more often by grazers. The values of interspecific grazing differences are (**a, d**)  $G' = 0.0005$ , (**b, e**)  $G' = 0.001$ , and (**c, f**)  $G' = 0.0015$ . The lattice size is  $100 \times 100$ . The dispersal distance is  $P = 40$ . The initial species density is  $I_i = 0.03$  (same for all species). The density of grazer cells is  $I_y = 0.4$ .

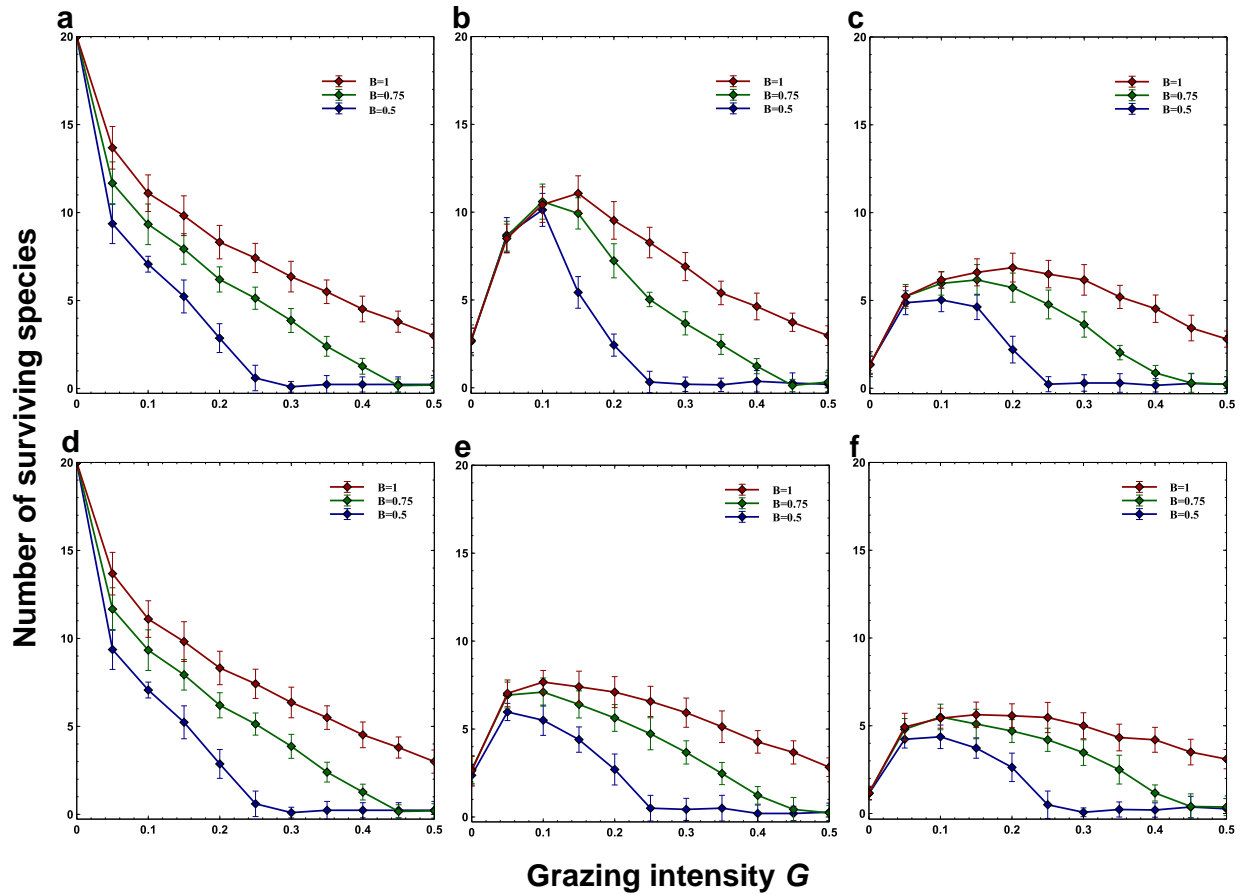

**Supplementary Figure 2.** The number of surviving species as a function of the basal grazing intensity  $G$  for various values of the basal birth rate  $B$  with  $G' = 0$ . **a-c** The grazing intensity of a species increases as the fecundity increases, i.e.,  $g_i = G + G'(20 - i)$  and  $B_i = B - 0.002(i - 1)$  for  $i = 1, 2, \dots, s$ , indicating a trade-off between the birth rate and grazing intensity of a species. **d-f** The grazing intensity decreases as the fecundity increases, i.e.,  $g_i = G + G'(i - 1)$  and  $B_i = B - 0.002(i - 1)$  for  $i = 1, 2, \dots, s$ , indicating that inferior species are eaten more often by grazers. The differences in the interspecific grazing rate are **(a, d)**  $G' = 0$ , **(b, d)**  $G' = 0.0005$ , and **(c, f)**  $G' = 0.0015$ . The lattice size is  $100 \times 100$ . The dispersal distance is  $P = 40$ . The initial species density is  $I_i = 0.03$  (same for all species). The density of grazer cells is  $I_y = 0.4$ . Error bars indicate the standard deviations.

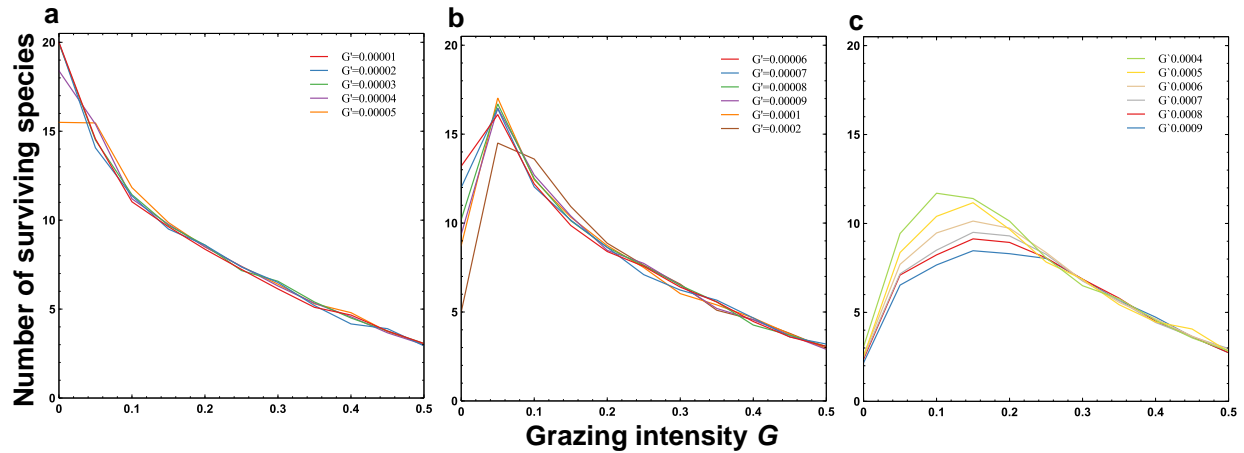

**Supplementary Figure 3.** The effect of the interspecific grazing difference value  $G'$  on the number of surviving species. **a-c** The grazing intensity of a species increases as the fecundity increases, i.e.,  $g_i = G + G'(20 - i)$  and  $B_i = B - 0.002(i - 1)$  for  $i = 1, 2, \dots, s$ , indicating a trade-off between the birth rate and grazing intensity of a species. The lattice size is  $100 \times 100$ . The dispersal distance is  $P = 40$ . The initial species density is  $I_i = 0.03$  (same for all species). The density of grazer cells is  $I_y = 0.4$ . Error bars indicate the standard deviations.

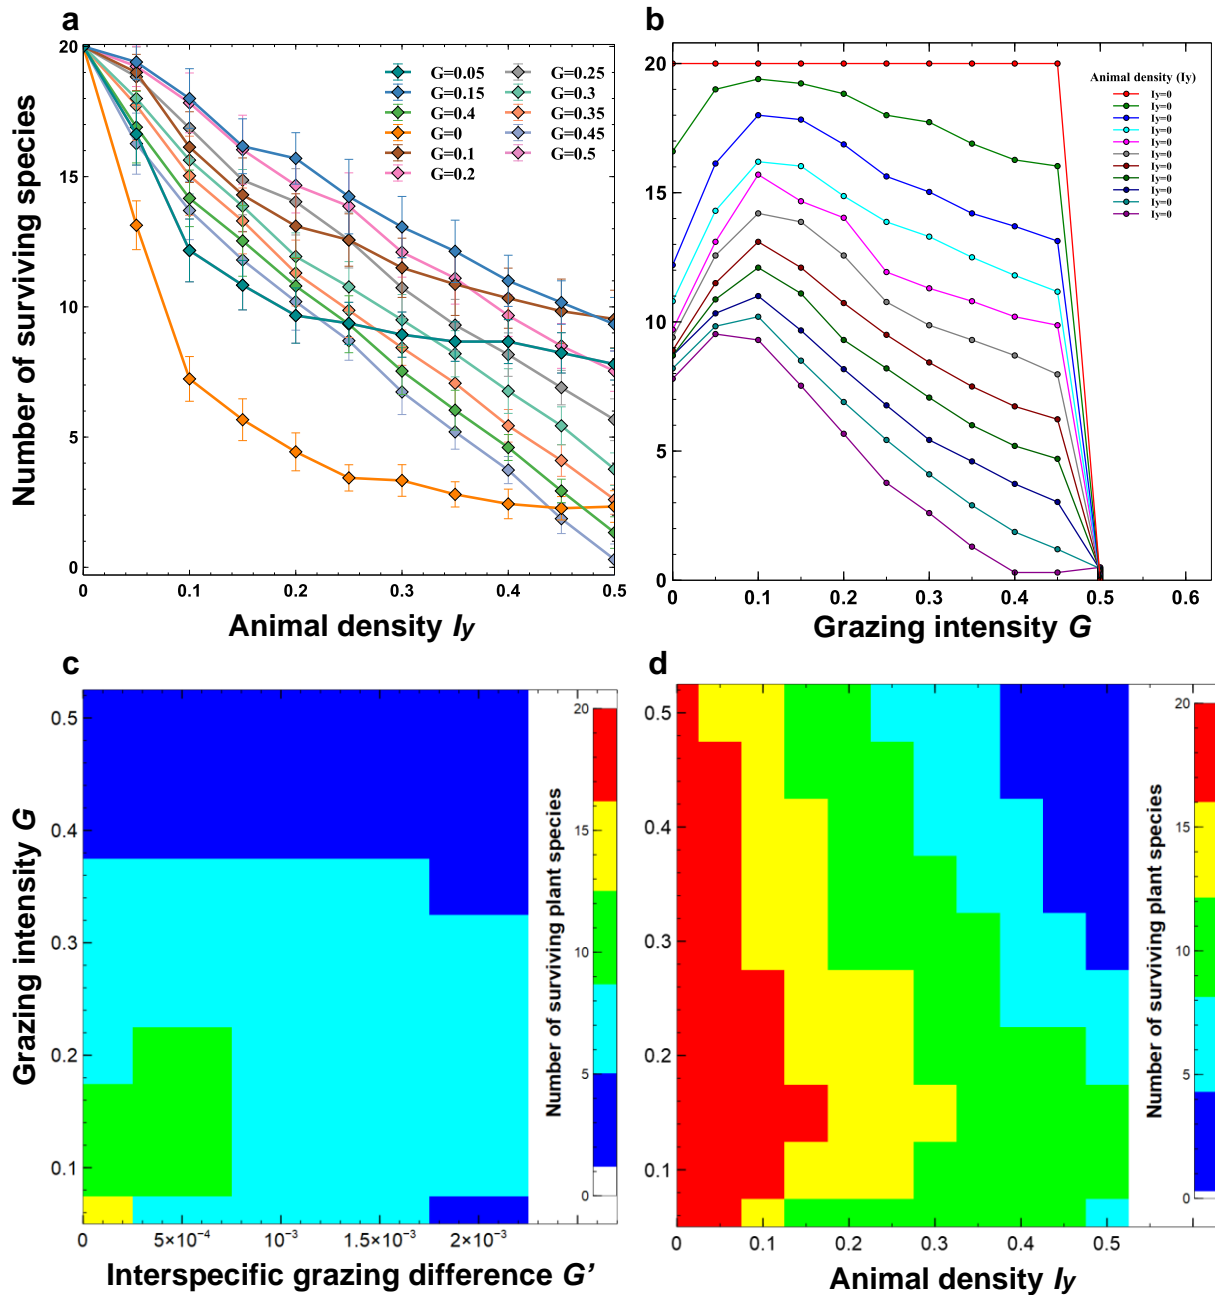

**Supplementary Figure 4.** The effect of the animal density  $I_y$ , basal grazing rate  $G$ , and interspecific grazing difference  $G'$  on the number of surviving species. **a-d** The grazing intensity of a species increases as the fecundity increases, i.e.,  $g_i = G + G'(20 - i)$  and  $B_i = B - 0.002(i - 1)$  for  $i = 1, 2, \dots, s$ , indicating a trade-off between the birth rate and grazing intensity of a species. The lattice size is  $100 \times 100$ . The dispersal distance is  $P = 40$ . The initial species density is  $I_i = 0.03$  (same for all species). **c** The density of grazer cells is  $I_y = 0.4$ . Error bars indicate the standard deviations.

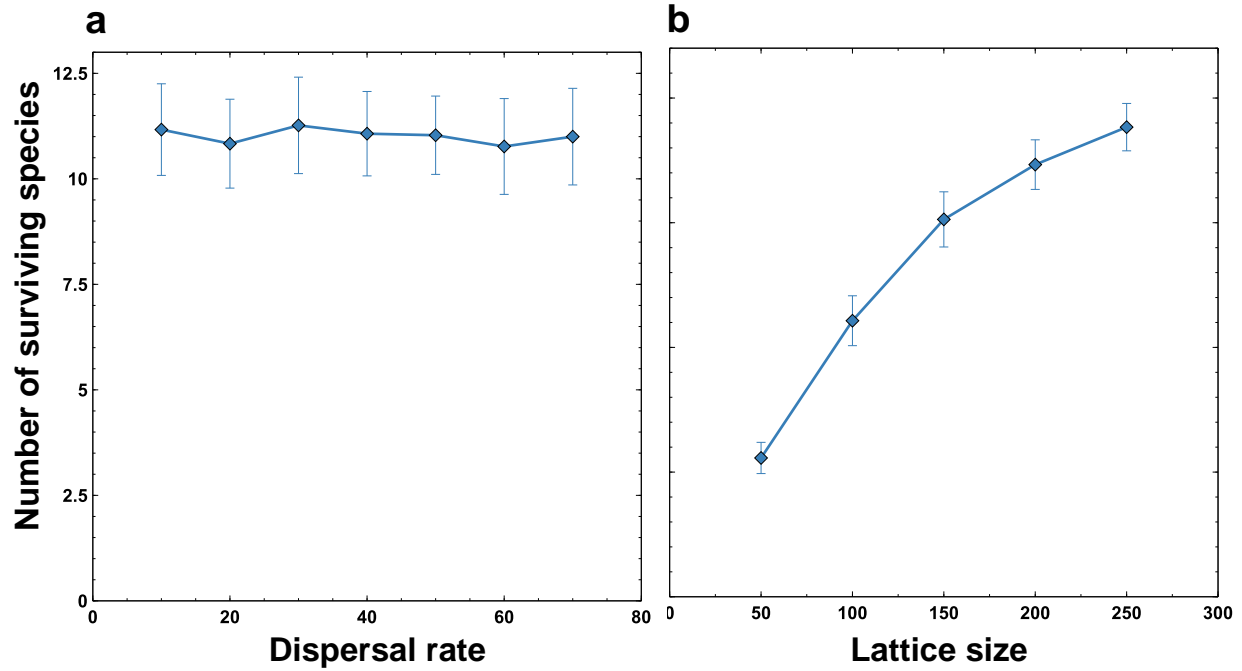

**Supplementary Figure 5.** The effects of dispersal range and lattice size on the number of surviving species in a grassland community under grazing. **a-b** The grazing rate of a species increases as the fecundity increases, i.e.,  $g_i = G + G'(20 - i)$  and  $B_i = B - 0.002(i - 1)$  for  $i = 1, 2, \dots, s$ , indicating a trade-off between the birth rate and grazing intensity of a species. The birth rate is  $B_i = B - 0.002(i - 1)$ , where  $B = 1$ . The lattice size is  $100 \times 100$  for **(a)**. The dispersal distance is  $P = 40$  for **(b)**. The initial species density is  $I_i = 0.03$  (same for all species). The density of grazer cells is  $I_y = 0.4$ . Error bars indicate the standard deviations.

**Supplementary Table 1.** Number of surviving species based on the grazing intensity  $G$  and interspecific grazing difference  $G'$ . The grazing intensity of a species increases as the fecundity increases, i.e.,  $g_i = G + G'(20 - i)$  and  $B_i = B - 0.002(i - 1)$  for  $i = 1, 2, \dots, s$ , indicating a trade-off between the birth rate and grazing intensity of a species. The lattice size is  $100 \times 100$ . The dispersal distance is  $P = 40$ . The initial species density is  $I_i = 0.03$  (same for all species). The density of grazer cells is  $I_y = 0.4$ .

| $G' \backslash G$ | 0     | 0.05  | 0.1   | 0.15  | 0.2   | 0.25 | 0.3  | 0.35 | 0.4  | 0.45 | 0.5  |
|-------------------|-------|-------|-------|-------|-------|------|------|------|------|------|------|
| 0.00001           | 20.00 | 14.57 | 11.03 | 9.63  | 8.37  | 7.23 | 6.13 | 5.10 | 4.67 | 3.77 | 3.07 |
| 0.00002           | 20.00 | 14.07 | 11.37 | 9.50  | 8.60  | 7.37 | 6.50 | 5.20 | 4.17 | 3.90 | 2.93 |
| 0.00003           | 19.93 | 14.50 | 11.43 | 9.70  | 8.60  | 7.17 | 6.57 | 5.40 | 4.50 | 3.77 | 3.07 |
| 0.00004           | 18.40 | 15.40 | 11.20 | 9.77  | 8.50  | 7.40 | 6.30 | 5.33 | 4.57 | 3.67 | 3.00 |
| 0.00005           | 15.50 | 15.47 | 11.83 | 9.87  | 8.50  | 7.40 | 6.40 | 5.30 | 4.80 | 3.73 | 3.03 |
| 0.00006           | 13.20 | 16.10 | 12.20 | 9.87  | 8.40  | 7.57 | 6.40 | 5.57 | 4.47 | 3.60 | 3.07 |
| 0.00007           | 12.00 | 16.43 | 12.03 | 10.17 | 8.63  | 7.10 | 6.23 | 5.67 | 4.67 | 3.60 | 3.20 |
| 0.00008           | 10.20 | 16.70 | 12.50 | 10.13 | 8.63  | 7.60 | 6.50 | 5.57 | 4.27 | 3.70 | 3.07 |
| 0.00009           | 9.37  | 16.47 | 12.70 | 10.40 | 8.47  | 7.73 | 6.50 | 5.20 | 4.57 | 3.70 | 2.90 |
| 0.0001            | 8.73  | 17.03 | 12.43 | 10.33 | 8.73  | 7.50 | 6.03 | 5.40 | 4.67 | 3.77 | 2.93 |
| 0.0002            | 5.00  | 14.50 | 13.60 | 10.93 | 8.87  | 7.63 | 6.57 | 5.10 | 4.57 | 3.80 | 2.97 |
| 0.0003            | 3.80  | 11.33 | 13.50 | 11.70 | 9.33  | 7.70 | 6.53 | 5.33 | 4.50 | 3.70 | 3.13 |
| 0.0004            | 3.07  | 9.43  | 11.70 | 11.40 | 10.13 | 8.07 | 6.50 | 5.77 | 4.57 | 3.57 | 2.83 |
| 0.0005            | 2.53  | 8.37  | 10.40 | 11.17 | 9.67  | 7.83 | 6.87 | 5.43 | 4.47 | 4.07 | 2.80 |
| 0.0006            | 2.57  | 7.70  | 9.47  | 10.13 | 9.73  | 8.37 | 6.80 | 5.57 | 4.63 | 3.67 | 2.87 |
| 0.0007            | 2.47  | 7.17  | 8.50  | 9.50  | 9.30  | 8.27 | 6.77 | 5.67 | 4.43 | 3.63 | 2.97 |
| 0.0008            | 2.37  | 7.10  | 8.23  | 9.13  | 8.93  | 8.07 | 6.87 | 5.80 | 4.50 | 3.63 | 2.73 |
| 0.0009            | 2.17  | 6.53  | 7.67  | 8.47  | 8.30  | 8.03 | 6.87 | 5.67 | 4.73 | 3.63 | 2.73 |
