# Supplementary material for: Grazing enhances species diversity in grassland communities
Source: PubMed Central journal article supplement (PMC6671982; doi:10.1038/s41598-019-47635-1), 2019-08-01
Supplement: 41598_2019_47635_MOESM2_ESM.pdf [file 41598_2019_47635_MOESM2_ESM.pdf]

**/\*SUPPLEMENTARY MATERIALS (Simulation program**

**/\*Title: Grazing enhances species diversity in grassland communities**

/\*Muhammad Almaududi Pulungan<sup>1,\*</sup>, Shota Suzuki<sup>5</sup>, Maica Krizna Areja Gavina<sup>1,2</sup>, Jerrold M. Tubay<sup>2</sup>, Hiromu Ito<sup>3,4</sup>, Momoka Nii<sup>5</sup>, Genki Ichinose<sup>1</sup>, Takuya Okabe<sup>5</sup>, Atsushi Ishida<sup>6</sup>, Masae Shiyomi<sup>7</sup>, Tatsuya Togashi<sup>9</sup>, JinYoshimura<sup>1,8,9,\*</sup>, Satoru Morita<sup>1,\*</sup>

/\*  
/\*  
/\*  
/\*

**/\*Simulation program (base program)**

/\*  
/\*\*\*\*\**internal processing*\*\*\*\*\*/

```
#include<stdio.h>
#include<stdlib.h>
#include<string.h>
#include<assert.h>
#include<math.h>
#include<time.h>
//#include<memory.h>
#define NUMBER 100
#define DISPLAY_INTERVAL 1//
#define DISPLAY_MODE 0 //
```

/\*\*\*\*\**field parameter*\*\*\*\*\*/

```
#define O 0           //identifier
#define A 1
#define B 2
#define C 3
#define D 4
#define E 5
#define F 6
#define G 7
#define H 8
#define I 9
#define J 10
#define K 11
#define L 12
#define M 13
#define N 14
#define P 15
#define Q 16
#define R 17
#define S 18
#define T 19
#define U 20
#define Y 21
#define Nu 20
#define FILENAME "filename.csv" //filename
```

```

double dp=0, predm=0;
double BA=0, MA=0;
double gr=0.001;
double G1=0;

#define SIZE 100
#define AREA (SIZE * SIZE)
#define outfield 10000
#define MaxStep 10000
#define trial 30
int sarray[trial];

/*****parameter*****/

//basal parameter of A
#define FdensA 0.03 //Density of A
#define BirthA BA //Birth rate of A
#define MortalA 0.1 //Mortality rate of A
#define GrazeA G1 + gr*(Nu-A) //grazing rate A
#define DispReachA 40 //Dispersion Reach of A

// basal parameter of B
#define FdensB 0.03 //Density of B
#define BirthB BirthA-0.002*(B-1) //Birth rate of B
#define MortalB 0.1 //Mortality rate of B
#define GrazeB G1 + gr*(Nu-B) //grazing rate B
#define DispReachB 40 //Dispersion Reach of B

// basal parameter of C
#define FdensC 0.03 //Density of C
#define BirthC BirthA-0.002*(C-1) //Birth rate of C
#define MortalC 0.1 //Mortality rate of C
#define GrazeC G1 + gr*(Nu-C) //grazing rate
#define DispReachC 40 //Dispersion Reach of C

// basal parameter of D
#define FdensD 0.03 //Density of D
#define BirthD BirthA-0.002*(D-1) //Birth rate of D
#define MortalD 0.1 //Mortality rate of D
#define GrazeD G1 + gr*(Nu-D) //grazing rate
#define DispReachD 40 //Dispersion Reach of D

// basal parameter of E
#define FdenseE 0.03 //Density of E
#define BirthE BirthA-0.002*(E-1) //Birth rate of E
#define MortalE 0.1 //Mortality rate of E
#define GrazeE G1 + gr*(Nu-E) //grazing rate
#define DispReachE 40 //Dispersion Reach of E

// basal parameter of F
#define FdensF 0.03 //Density of F

```

```

#define BirthF BirthA-0.002*(F-1) //Birth rate of F
#define MortalF 0.1 //Mortality rate of F
#define GrazeF G1 + gr*(Nu-F) //grazing rate
#define DispReachF 40 //Dispersion Reach of F

// basal parameter of G
#define FdensG 0.03 //Density of G
#define BirthG BirthA-0.002*(G-1) //Birth rate of G
#define MortalG 0.1 //Mortality rate of G
#define GrazeG G1 + gr*(Nu-G) //grazing rate
#define DispReachG 40 //Dispersion Reach of G

// basal parameter of H
#define FdensH 0.03 //Density of H
#define BirthH BirthA-0.002*(H-1) //Birth rate of H
#define MortalH 0.1 //Mortality rate of H
#define GrazeH G1 + gr*(Nu-H) //grazing rate
#define DispReachH 40 //Dispersion Reach of H

// basal parameter of I
#define FdensI 0.03 //Density of I
#define BirthI BirthA-0.002*(I-1) //Birth rate of I
#define MortalI 0.1 //Mortality rate of I
#define GrazeI G1 + gr*(Nu-I) //grazing rate
#define DispReachI 40 //Dispersion Reach of I

// basal parameter of J
#define FdensJ 0.03 //Density of J
#define BirthJ BirthA-0.002*(J-1) //Birth rate of J
#define MortalJ 0.1 //Mortality rate of J
#define GrazeJ G1 + gr*(Nu-J) //grazing rate
#define DispReachJ 40 //Dispersion Reach of J

// basal parameter of K
#define FdensK 0.03 //Density of K
#define BirthK BirthA-0.002*(K-1) //Birth rate of K
#define MortalK 0.1 //Mortality rate of K
#define GrazeK G1 + gr*(Nu-K) //grazing rate
#define DispReachK 40 //Dispersion Reach of K

// basal parameter of L
#define FdensL 0.03 //Density of L
#define BirthL BirthA-0.002*(L-1) //Birth rate of L
#define MortalL 0.1 //Mortality rate of L
#define GrazeL G1 + gr*(Nu-L) //grazing rate
#define DispReachL 40 //Dispersion Reach of L

// basal parameter of M
#define FdensM 0.03 //Density of M
#define BirthM BirthA-0.002*(M-1) //Birth rate of M
#define MortalM 0.1 //Mortality rate of M
#define GrazeM G1 + gr*(Nu-M) //grazing rate
#define DispReachM 40 //Dispersion Reach of M

// basal parameter of N

```

```

#define FdensN 0.03 //Density of N
#define BirthN BirthA-0.002*(N-1) //Birth rate of N
#define MortalN 0.1 //Mortality rate of N
#define GrazeN G1 + gr*(Nu-N) //grazing rate
#define DispReachN 40 //Dispersion Reach of N

// basal parameter of P
#define FdensP 0.03 //Density of P
#define BirthP BirthA-0.002*(P-1) //Birth rate of P
#define MortalP 0.1 //Mortality rate of P
#define GrazeP G1 + gr*(Nu-P) //grazing rate

#define DispReachP 40 //Dispersion Reach of P

// basal parameter of Q
#define FdensQ 0.03 //Density of Q
#define BirthQ BirthA-0.002*(Q-1) //Birth rate of Q
#define MortalQ 0.1 //Mortality rate of Q
#define GrazeQ G1 + gr*(Nu-Q) //grazing rate
#define DispReachQ 40 //Dispersion Reach of Q

// basal parameter of R
#define FdensR 0.03 //Density of R
#define BirthR BirthA-0.002*(R-1) //Birth rate of R
#define MortalR 0.1 //Mortality rate of R
#define GrazeR G1 + gr*(Nu-R) //grazing rate
#define DispReachR 40 //Dispersion Reach of R

// basal parameter of S
#define FdensS 0.03 //Density of S
#define BirthS BirthA-0.002*(S-1) //Birth rate of S
#define MortalS 0.1 //Mortality rate of S
#define GrazeS G1 + gr*(Nu-S) //grazing rate
#define DispReachS 40 //Dispersion Reach of S

// basal parameter of T
#define FdensT 0.03 //Density of T
#define BirthT BirthA-0.002*(T-1) //Birth rate of T
#define MortalT 0.1 //Mortality rate of T
#define GrazeT G1 + gr*(Nu-T) //grazing rate
#define DispReachT 40 //Dispersion Reach of T

// basal parameter of U
#define FdensU 0.03 //Density of U
#define BirthU BirthA-0.002*(U-1) //Birth rate of U
#define MortalU 0.1 //Mortality rate of U
#define GrazeU G1 + gr*(Nu-U) //grazing rate
#define DispReachU 40 //Dispersion Reach of U

// basal parameter of Y
#define FdensY 0.4 //Density of Y
#define PredY (1.0-predm) //Birth rate of Y

//static double

```

*DensA, DensB, DensC, DensD, DensO, DensE, DensF, DensG, DensH, DensI, DensJ, DensK, DensL, DensM, DensN, DensP, DensQ, DensR, DensS, DensT, DensU, DensY;*

```
double birthA;           //to simulate using variable birth rate
double birthB;
double birthC;
double birthD;
double birthE;
double birthF;
double birthG;
double birthH;
double birthI;
double birthJ;
double birthK;
double birthL;
double birthM;
double birthN;
double birthP;
double birthQ;
double birthR;
double birthS;
double birthT;
double birthU;
double birthY;
```

```
int field[SIZE][SIZE];
int field2[SIZE][SIZE];
```

```
int step;
```

```
double frevisionA[SIZE][SIZE];           //field revision
double frevisionB[SIZE][SIZE];
double frevisionC[SIZE][SIZE];
double frevisionD[SIZE][SIZE];
double frevisionE[SIZE][SIZE];
double frevisionF[SIZE][SIZE];
double frevisionG[SIZE][SIZE];
double frevisionH[SIZE][SIZE];
double frevisionI[SIZE][SIZE];
double frevisionJ[SIZE][SIZE];
double frevisionK[SIZE][SIZE];
double frevisionL[SIZE][SIZE];
double frevisionM[SIZE][SIZE];
double frevisionN[SIZE][SIZE];
double frevisionP[SIZE][SIZE];
double frevisionQ[SIZE][SIZE];
double frevisionR[SIZE][SIZE];
double frevisionS[SIZE][SIZE];
double frevisionT[SIZE][SIZE];
double frevisionU[SIZE][SIZE];
double frevisionY[SIZE][SIZE];
```

```
double mrateA[SIZE][SIZE];
double mrateB[SIZE][SIZE];
double mrateC[SIZE][SIZE];
```

```

double mrateD[SIZE][SIZE];
double mrateE[SIZE][SIZE];
double mrateF[SIZE][SIZE];
double mrateG[SIZE][SIZE];
double mrateH[SIZE][SIZE];
double mrateI[SIZE][SIZE];
double mrateJ[SIZE][SIZE];
double mrateK[SIZE][SIZE];
double mrateL[SIZE][SIZE];
double mrateM[SIZE][SIZE];
double mrateN[SIZE][SIZE];
double mrateP[SIZE][SIZE];
double mrateQ[SIZE][SIZE];
double mrateR[SIZE][SIZE];
double mrateS[SIZE][SIZE];
double mrateT[SIZE][SIZE];
double mrateU[SIZE][SIZE];
double mrateY[SIZE][SIZE];

double densA[MaxStep+1];
double densB[MaxStep+1];
double densC[MaxStep+1];
double densD[MaxStep+1];
double densE[MaxStep+1];
double densF[MaxStep+1];
double densG[MaxStep+1];
double densH[MaxStep+1];
double densI[MaxStep+1];
double densJ[MaxStep+1];
double densK[MaxStep+1];
double densL[MaxStep+1];
double densM[MaxStep+1];
double densN[MaxStep+1];
double densP[MaxStep+1];
double densQ[MaxStep+1];
double densR[MaxStep+1];
double densS[MaxStep+1];
double densT[MaxStep+1];
double densU[MaxStep+1];
double densY[MaxStep+1];

/* random number(integer) */
int randPoint(int r){ //0 to r-1
    return rand()%r;
}
/* random number(probability)*/
double drand48(){
    return (double)rand()/RAND_MAX; //0 to 1
}

/* random number initializer */
void srand48(long time_t){
    srand(time_t);
}

```

```
/*connect field ends*/
```

```
int mod(int x){  
    int z;  
    z = (x+SIZE)%SIZE;  
    return z;  
}
```

```
/* not connect field ends*/
```

```
int mod2(int x){  
    int z;  
    if(x>SIZE-2){  
        z =outfield;  
    }  
    else if(x<0){  
        z =outfield;  
    }  
    else{  
        z=x;  
    }  
    return z;  
}
```

```
/*reproduction process Local*/
```

```
void ReproductionD() { //Reproduction Disperse  
    int species;  
    int rx, ry;  
    int rx1,ry1;  
    int r1,r2;  
    double revision=0,rate=1;
```

```
intReach[31]={0,DispReachA,DispReachB,DispReachC,DispReachD,DispReachE,DispReachF,DispReachG,DispReachH,DispReachI,DispReachJ,DispReachK,DispReachL,DispReachM,DispReachN,DispReachP,DispReachQ,DispReachR,DispReachS,DispReachT,DispReachU};
```

```
rx=randPoint(SIZE);  
ry=randPoint(SIZE);
```

```
if(field[rx][ry]!=0){  
    if(field[rx][ry]==A){  
        rate=BirthA;  
        species=A;  
    }  
    else if(field[rx][ry]==B){  
        rate=BirthB;  
        species=B;  
    }  
    else if(field[rx][ry]==C){  
        rate=BirthC;  
        species=C;  
    }  
    else if(field[rx][ry]==D){  
        rate=BirthD;  
        species=D;
```

```
}
else if(field[rx][ry]==E){
    rate=BirthE;
    species=E;
}
else if(field[rx][ry]==F){
    rate=BirthF;
    species=F;
}
else if(field[rx][ry]==G){
    rate=BirthG;
    species=G;
}
else if(field[rx][ry]==H){
    rate=BirthH;
    species=H;
}
else if(field[rx][ry]==I){
    rate=BirthI;
    species=I;
}
else if(field[rx][ry]==J){
    rate=BirthJ;
    species=J;
}
    else if(field[rx][ry]==K){
        rate=BirthK;
        species=K;
}
else if(field[rx][ry]==L){
    rate=BirthL;
    species=L;
}
else if(field[rx][ry]==M){
    rate=BirthM;
    species=M;
}
else if(field[rx][ry]==N){
    rate=BirthN;
    species=N;
}
else if(field[rx][ry]==P){
    rate=BirthP;
    species=P;
}
else if(field[rx][ry]==Q){
    rate=BirthQ;
    species=Q;
}
else if(field[rx][ry]==R){
    rate=BirthR;
    species=R;
}
else if(field[rx][ry]==S){
    rate=BirthS;
```



```

    species=S;
}
else if(field[rx][ry]==T){
    rate=BirthT;
    species=T;
}else if(field[rx][ry]==U){
    rate=BirthU;
    species=U;
}else if(field[rx][ry]==Y ){
}else{
    printf("something is wrong in ReproductionD1.");
}

do{
    do{
        r1=randPoint(Reach[species]*2+1)-Reach[species];
        r2=randPoint(Reach[species]*2+1)-Reach[species];
        }while(r1==0&&r2==0);
        }while(abs(r1)+abs(r2)>=Reach[species]+1);

rx1=mod(rx+r1);
ry1=mod(ry+r2);

if(field[rx][ry]==A){
    revision=frevisionA[rx1][ry1];
}
else if(field[rx][ry]==B){
    revision=frevisionB[rx1][ry1];
}
else if(field[rx][ry]==C){
    revision=frevisionC[rx1][ry1];
}
else if(field[rx][ry]==D){
    revision=frevisionD[rx1][ry1];
}
else if(field[rx][ry]==E){
    revision=frevisionE[rx1][ry1];
}
else if(field[rx][ry]==F){
    revision=frevisionF[rx1][ry1];
}
else if(field[rx][ry]==G){
    revision=frevisionG[rx1][ry1];
}
else if(field[rx][ry]==H){
    revision=frevisionH[rx1][ry1];
}
else if(field[rx][ry]==I){
    revision=frevisionI[rx1][ry1];
}
else if(field[rx][ry]==J){
    revision=frevisionJ[rx1][ry1];
}
else if(field[rx][ry]==K){

```

```

    revision=frevisionK[rx1][ry1];
}
else if(field[rx][ry]==L){
    revision=frevisionL[rx1][ry1];
}
else if(field[rx][ry]==M){
    revision=frevisionM[rx1][ry1];
}
else if(field[rx][ry]==N){
    revision=frevisionN[rx1][ry1];
}
else if(field[rx][ry]==P){
    revision=frevisionP[rx1][ry1];
}
else if(field[rx][ry]==Q){
    revision=frevisionQ[rx1][ry1];
}
else if(field[rx][ry]==R){
    revision=frevisionR[rx1][ry1];
}
else if(field[rx][ry]==S){
    revision=frevisionS[rx1][ry1];
}
else if(field[rx][ry]==T){
    revision=frevisionT[rx1][ry1];
}
else if(field[rx][ry]==U){
    revision=frevisionU[rx1][ry1];
}
else if(field[rx][ry]==Y){
}
else{
    printf("something is wrong in ReproductionD2.");
}
/*reproduction*/
//if(rx1!=outfield && ry1!=outfield){
if((field[rx1][ry1]==0) && drand48()<rate*revision){
    field[rx1][ry1]=species;
}
}
}

```

```

/*predation process*/

```

```

void Pred(){

```

```

    int rx, ry;
    int rx2, ry2;
    int r;
    double p;

```

```

    rx=randPoint(SIZE);
    ry=randPoint(SIZE);
    p=drand48();

```

```

        if(field2[rx][ry]==Y){
            if(field[rx][ry]!=0){
                if(field[rx][ry]==A){

```

```
        if(p<GrazeA){
            field[rx][ry]=0;
        }
    }else if(field[rx][ry]==B){
        if(p<GrazeB){
            field[rx][ry]=0;
        }
    }else if(field[rx][ry]==C){
        if(p<GrazeC){
            field[rx][ry]=0;
        }
    }else if(field[rx][ry]==D){
        if(p<GrazeD){
            field[rx][ry]=0;
        }
    }else if(field[rx][ry]==E){
        if(p<GrazeE){
            field[rx][ry]=0;
        }
    }else if(field[rx][ry]==F){
        if(p<GrazeF){
            field[rx][ry]=0;
        }
    }else if(field[rx][ry]==G){
        if(p<GrazeG){
            field[rx][ry]=0;
        }
    }else if(field[rx][ry]==H){
        if(p<GrazeH){
            field[rx][ry]=0;
        }
    }else if(field[rx][ry]==I){
        if(p<GrazeI){
            field[rx][ry]=0;
        }
    }else if(field[rx][ry]==J){
        if(p<GrazeJ){
            field[rx][ry]=0;
        }
    }else if(field[rx][ry]==K){
        if(p<GrazeK){
            field[rx][ry]=0;
        }
    }else if(field[rx][ry]==L){
        if(p<GrazeL){
            field[rx][ry]=0;
        }
    }else if(field[rx][ry]==M){
        if(p<GrazeM){
            field[rx][ry]=0;
        }
    }else if(field[rx][ry]==N){
        if(p<GrazeN){
            field[rx][ry]=0;
        }
    }
}
```

```

    }else if(field[rx][ry]==P){
        if(p<GrazeP){
            field[rx][ry]=0;
        }
    }else if(field[rx][ry]==Q){
        if(p<GrazeQ){
            field[rx][ry]=0;
        }
    }else if(field[rx][ry]==R){
        if(p<GrazeR){
            field[rx][ry]=0;
        }
    }else if(field[rx][ry]==S){
        if(p<GrazeS){
            field[rx][ry]=0;
        }
    }else if(field[rx][ry]==T){
        if(p<GrazeT){
            field[rx][ry]=0;
        }
    }else if(field[rx][ry]==U){
        if(p<GrazeU){
            field[rx][ry]=0;
        }
    }
    }else if(field[rx][ry]==0){
    }
}else if(field2[rx][ry]!=Y){
}
}

```

*/\*mortality process of X\*/*

```

void Xmortal(){

    int rx,ry;
    double rate=0, die;

    rx=randPoint(SIZE);
    ry=randPoint(SIZE);

    if(field[rx][ry]!=0){
        if(field[rx][ry]==A){
            rate=mrateA[rx][ry];
            die=MortalA;
        }
        else if(field[rx][ry]==B){
            rate=mrateB[rx][ry];
            die=MortalB;
        }
        else if(field[rx][ry]==C){
            rate=mrateC[rx][ry];
            die=MortalC;
        }
        else if(field[rx][ry]==D){
            rate=mrateD[rx][ry];

```

```
    die=MortalD;
}
else if(field[rx][ry]==E){
    rate=mrateE[rx][ry];
    die=MortalE;
}
else if(field[rx][ry]==F){
    rate=mrateF[rx][ry];
    die=MortalF;
}
else if(field[rx][ry]==G){
    rate=mrateG[rx][ry];
    die=MortalG;
}
else if(field[rx][ry]==H){
    rate=mrateH[rx][ry];
    die=MortalH;
}
else if(field[rx][ry]==I){
    rate=mrateI[rx][ry];
    die=MortalI;
}
else if(field[rx][ry]==J){
    rate=mrateJ[rx][ry];
    die=MortalJ;
}
else if(field[rx][ry]==K){
    rate=mrateK[rx][ry];
    die=MortalK;
}
else if(field[rx][ry]==L){
    rate=mrateL[rx][ry];
    die=MortalL;
}
else if(field[rx][ry]==M){
    rate=mrateM[rx][ry];
    die=MortalM;
}
else if(field[rx][ry]==N){
    rate=mrateN[rx][ry];
    die=MortalN;
}
else if(field[rx][ry]==P){
    rate=mrateP[rx][ry];
    die=MortalP;
}
else if(field[rx][ry]==Q){
    rate=mrateQ[rx][ry];
    die=MortalQ;
}
else if(field[rx][ry]==R){
    rate=mrateR[rx][ry];
    die=MortalR;
}
else if(field[rx][ry]==S){
```

```

        rate=mrateS[rx][ry];
        die=MortalS;
    }
    else if(field[rx][ry]==T){
        rate=mrateT[rx][ry];
        die=MortalT;
    }
    else if(field[rx][ry]==U){
        rate=mrateU[rx][ry];
        die=MortalU;
    }else if(field[rx][ry]==Y){
    }else{
        printf("something is wrong in mortal.");
    }
}

if(drand48(<die*rate){
    field[rx][ry]=0;
}
}
}

void format(){
    int i,j;
    for(i=0;i<SIZE;i++){
        for(j=0;j<SIZE;j++){
            field[i][j]=0;
            field2[i][j]=0;
            frevisionA[i][j]=1;
            frevisionB[i][j]=1;
            frevisionC[i][j]=1;
            frevisionD[i][j]=1;
            frevisionE[i][j]=1;
            frevisionF[i][j]=1;
            frevisionG[i][j]=1;
            frevisionH[i][j]=1;
            frevisionI[i][j]=1;
            frevisionJ[i][j]=1;
            frevisionK[i][j]=1;
            frevisionL[i][j]=1;
            frevisionM[i][j]=1;
            frevisionN[i][j]=1;
            frevisionP[i][j]=1;
            frevisionQ[i][j]=1;
            frevisionR[i][j]=1;
            frevisionS[i][j]=1;
            frevisionT[i][j]=1;
            frevisionU[i][j]=1;
            frevisionY[i][j]=1;

            mrateA[i][j]=1;
            mrateB[i][j]=1;
            mrateC[i][j]=1;
            mrateD[i][j]=1;
            mrateE[i][j]=1;
            mrateF[i][j]=1;
        }
    }
}

```

*//field initializer*

```

    mrateG[i][j]=1;
    mrateH[i][j]=1;
    mrateI[i][j]=1;
    mrateJ[i][j]=1;
    mrateK[i][j]=1;
    mrateL[i][j]=1;
    mrateM[i][j]=1;
    mrateN[i][j]=1;
    mrateP[i][j]=1;
    mrateQ[i][j]=1;
    mrateR[i][j]=1;
    mrateS[i][j]=1;
    mrateT[i][j]=1;
    mrateU[i][j]=1;
    mrateY[i][j]=1;
}
}
}

/*  disposer  */
void dispose(int species,double density){
    int num,i,j;
    int limit=(int)(AREA*density);

    for(num=0;num<limit;num++){
        do{
            i=randPoint(SIZE);
            j=randPoint(SIZE);
        }while(field[i][j]!=0);

        if(species==A){
            if(frevisionA[i][j]!=0){
                field[i][j]=species;
            }
            else if(frevisionA[i][j]==0){
                num--;
            }
        }
        else if(species==B){
            if(frevisionB[i][j]!=0){
                field[i][j]=species;
            }
            else if(frevisionB[i][j]==0){
                num--;
            }
        }
        else if(species==C){
            if(frevisionC[i][j]!=0){
                field[i][j]=species;
            }
            else if(frevisionC[i][j]==0){
                num--;
            }
        }
        else if(species==D){

```

```
    if(frevisonD[i][j]!=0){
        field[i][j]=species;
    }
    else if(frevisonD[i][j]==0){
        num--;
    }
}
else if(species==E){
    if(frevisonE[i][j]!=0){
        field[i][j]=species;
    }
    else if(frevisonE[i][j]==0){
        num--;
    }
}
else if(species==F){
    if(frevisonF[i][j]!=0){
        field[i][j]=species;
    }
    else if(frevisonF[i][j]==0){
        num--;
    }
}
else if(species==G){
    if(frevisonG[i][j]!=0){
        field[i][j]=species;
    }
    else if(frevisonG[i][j]==0){
        num--;
    }
}
else if(species==H){
    if(frevisonH[i][j]!=0){
        field[i][j]=species;
    }
    else if(frevisonH[i][j]==0){
        num--;
    }
}
else if(species==I){
    if(frevisonI[i][j]!=0){
        field[i][j]=species;
    }
    else if(frevisonI[i][j]==0){
        num--;
    }
}
else if(species==J){
    if(frevisonJ[i][j]!=0){
        field[i][j]=species;
    }
    else if(frevisonJ[i][j]==0){
        num--;
    }
}
}
```



```

else if(species==K){
  if(frevisionK[i][j]!=0){
    field[i][j]=species;
  }
  else if(frevisionK[i][j]==0){
    num--;
  }
}
else if(species==L){
  if(frevisionL[i][j]!=0){
    field[i][j]=species;
  }
  else if(frevisionL[i][j]==0){
    num--;
  }
}
else if(species==M){
  if(frevisionM[i][j]!=0){
    field[i][j]=species;
  }
  else if(frevisionM[i][j]==0){
    num--;
  }
}
else if(species==N){
  if(frevisionN[i][j]!=0){
    field[i][j]=species;
  }
  else if(frevisionN[i][j]==0
){
    num--;
  }
}
else if(species==P){
  if(frevisionP[i][j]!=0){
    field[i][j]=species;
  }
  else if(frevisionP[i][j]==0){
    num--;
  }
}
else if(species==Q){
  if(frevisionQ[i][j]!=0){
    field[i][j]=species;
  }
  else if(frevisionQ[i][j]==0){
    num--;
  }
}
else if(species==R){
  if(frevisionR[i][j]!=0){
    field[i][j]=species;
  }
  else if(frevisionR[i][j]==0){
    num--;
  }
}

```

```

    }
  }
  else if(species==S){
    if(frevisionS[i][j]!=0){
      field[i][j]=species;
    }
    else if(frevisionS[i][j]==0){
      num--;
    }
  }
  else if(species==T){
    if(frevisionT[i][j]!=0){
      field[i][j]=species;
    }
    else if(frevisionT[i][j]==0){
      num--;
    }
  }
  else if(species==U){
    if(frevisionU[i][j]!=0){
      field[i][j]=species;
    }
    else if(frevisionU[i][j]==0){
      num--;
    }
  }
}
}

void Ydispose(int species,double density){
  int num,i,j;
  int limit=(int)(AREA*density);

  for(num=0;num<limit;num++){
    do{
      i=randPoint(SIZE);
      j=randPoint(SIZE);
    }while(field2[i][j]!=0);

    if(species==Y){
      if(frevisionY[i][j]!=0){
        field2[i][j]=species;
      }
      else if(frevisionY[i][j]==0){
        num--;
      }
    }
  }
}

void disprevC() { //dispose revision continuous (0~1)
  int i,j;

  for(i=0;i<SIZE;i++){
    for(j=0;j<SIZE;j++){
      frevisionA[i][j]=drand48();
    }
  }
}

```

```

    frevisionB[i][j]=drand48();
    frevisionC[i][j]=drand48();
    frevisionD[i][j]=drand48();
    frevisionE[i][j]=drand48();
    frevisionF[i][j]=drand48();
    frevisionG[i][j]=drand48();
    frevisionH[i][j]=drand48();
    frevisionI[i][j]=drand48();
    frevisionJ[i][j]=drand48();
    frevisionK[i][j]=drand48();
    frevisionL[i][j]=drand48();
    frevisionM[i][j]=drand48();
    frevisionN[i][j]=drand48();
    frevisionP[i][j]=drand48();
    frevisionQ[i][j]=drand48();
    frevisionR[i][j]=drand48();
    frevisionS[i][j]=drand48();
    frevisionT[i][j]=drand48();
    frevisionU[i][j]=drand48();
    frevisionY[i][j]=drand48();
}
}
}

```

```

//dispose mortality rate
int i,j;

```

```

for(i=0;i<SIZE;i++){
    for(j=0;j<SIZE;j++){
        mrateA[i][j]=1;
        mrateB[i][j]=1;
        mrateC[i][j]=1;
        mrateD[i][j]=1;
        mrateE[i][j]=1;
        mrateF[i][j]=1;
        mrateG[i][j]=1;
        mrateH[i][j]=1;
        mrateI[i][j]=1;
        mrateJ[i][j]=1;
        mrateK[i][j]=1;
        mrateL[i][j]=1;
        mrateM[i][j]=1;
        mrateN[i][j]=1;
        mrateP[i][j]=1;
        mrateQ[i][j]=1;
        mrateR[i][j]=1;
        mrateS[i][j]=1;
        mrateT[i][j]=1;
        mrateU[i][j]=1;
        mrateY[i][j]=1;
    }
}
}

```

```

/*    density counter    */

```

```

double CountDensity(int target){
    int i,j;
    double number=0;
    double density=0.0;
    for(i=0;i<SIZE;i++){
        for(j=0;j<SIZE;j++){
            if(field[i][j]==target){
                number++;
            }
        }
    }
    density=number/AREA;
    return(density);
}

double CountDensity2(int target){
    int i,j;
    double number=0;
    double density=0.0;
    for(i=0;i<SIZE;i++){
        for(j=0;j<SIZE;j++){
            if(field2[i][j]==target){
                number++;
            }
        }
    }
    density=number/AREA;
    return(density);
}

int main(){
    FILE *fp;
    if ((fp = fopen(FILENAME, "w")) == NULL) {
        printf("file open error!!\n");
        exit(EXIT_FAILURE);
    }

    srand((unsigned)time(NULL));
    int nn, nn1, nn2;

    for(nn1=0,G1=0;nn1<=10;nn1++,G1+=0.05){
        for(nn2=0,BA=0;nn2<=20;nn2++,BA+=0.05){
            double s=0,a=0;
            int n=0,p=0,m=0,size=0,area;
            int k,u,v,z;

            for(p=0;p<=MaxStep;p++){           //start of density initializer
                densA[p]=0;
                densB[p]=0;
                densC[p]=0;
                densD[p]=0;
                densE[p]=0;
                densF[p]=0;
                densG[p]=0;
            }
        }
    }
}

```

```

densH[p]=0;
densI[p]=0;
densJ[p]=0;
densK[p]=0;
densL[p]=0;
densM[p]=0;
densN[p]=0;
densP[p]=0;
densQ[p]=0;
densR[p]=0;
densS[p]=0;
densT[p]=0;
densU[p]=0;
} //end of density initializer
float var=0;
for(n=0;n<=trial-1;n+=1){ //start of trial

    format();

    disprevC(); //initial disposition of fÃ

    dispose(A,FdensA); //initial disposition of species
    dispose(B,FdensB);
    dispose(C,FdensC);
    dispose(D,FdensD);
    dispose(E,FdensE);
    dispose(F,FdensF);
    dispose(G,FdensG);
    dispose(H,FdensH);
    dispose(I,FdensI);
    dispose(J,FdensJ);
    dispose(K,FdensK);
    dispose(L,FdensL);
    dispose(M,FdensM);
    dispose(N,FdensN);
    dispose(P,FdensP);
    dispose(Q,FdensQ);
    dispose(R,FdensR);
    dispose(S,FdensS);
    dispose(T,FdensT);
    dispose(U,FdensU);

    step=0;
int sinit=s;
    for(step=0;step<=MaxStep;step++){ //start of 1 trial

        for(u=0;u<SIZE;u++){
            for(v=0;v<SIZE;v++){
                field2[u][v]=0;
            }
        }

        Ydispose(Y,FdensY);

        for (m=1;m<=AREA;m++){ //size

```

```

        ReproductionD(); //reproductionprocess(Local)
    for(z=0;z<3;z++){ //grazing times
        Pred(); //predation process
    }
    Xmortal; //natural grass mortality
}

densA[step]=CountDensity(A);
densB[step]=CountDensity(B);
densC[step]=CountDensity(C);
densD[step]=CountDensity(D);
densE[step]=CountDensity(E);
densF[step]=CountDensity(F);
densG[step]=CountDensity(G);
densH[step]=CountDensity(H);
densI[step]=CountDensity(I);
densJ[step]=CountDensity(J);
densK[step]=CountDensity(K);
densL[step]=CountDensity(L);
densM[step]=CountDensity(M);
densN[step]=CountDensity(N);
densP[step]=CountDensity(P);
densQ[step]=CountDensity(Q);
densR[step]=CountDensity(R);
densS[step]=CountDensity(S);
densT[step]=CountDensity(T);
densU[step]=CountDensity(U);

//density output
fprintf(fp, "%4d,", step);
fprintf(fp, "%1.4f,", densA[step]);
fprintf(fp, "%1.4f,", densB[step]);
fprintf(fp, "%1.4f,", densC[step]);
fprintf(fp, "%1.4f,", densD[step]);
fprintf(fp, "%1.4f,", densE[step]);
fprintf(fp, "%1.4f,", densF[step]);
fprintf(fp, "%1.4f,", densG[step]);
fprintf(fp, "%1.4f,", densH[step]);
fprintf(fp, "%1.4f,", densI[step]);
fprintf(fp, "%1.4f,", densJ[step]);
fprintf(fp, "%1.4f,", densK[step]);
fprintf(fp, "%1.4f,", densL[step]);
fprintf(fp, "%1.4f,", densM[step]);
fprintf(fp, "%1.4f,", densN[step]);
fprintf(fp, "%1.4f,", densP[step]);
fprintf(fp, "%1.4f,", densQ[step]);
fprintf(fp, "%1.4f,", densR[step]);
fprintf(fp, "%1.4f,", densS[step]);
fprintf(fp, "%1.4f,", densT[step]);
fprintf(fp, "%1.4f,", densU[step]);
fprintf(fp, "%n");

if(step==MaxStep){ //species counter

```

```

        if(densA[step]>0) s++;
        if(densB[step]>0) s++;
        if(densC[step]>0) s++;
        if(densD[step]>0) s++;
        if(densE[step]>0) s++;
        if(densF[step]>0) s++;
        if(densG[step]>0) s++;
        if(densH[step]>0) s++;
        if(densI[step]>0) s++;
        if(densJ[step]>0) s++;
        if(densK[step]>0) s++;
        if(densL[step]>0) s++;
        if(densM[step]>0) s++;
        if(densN[step]>0) s++;
        if(densP[step]>0) s++;
        if(densQ[step]>0) s++;
        if(densR[step]>0) s++;
        if(densS[step]>0) s++;
        if(densT[step]>0) s++;
        if(densU[step]>0) s++;

    }                //end of species counter

    printf("%d\n",step);

}                //end of 1 trial
sarray[n]=s-sinit;
}                //end of trial

    fprintf(fp,"%n");
    fprintf(fp,"Grazingrate: %f\n Initial grazing: %f\n Birth rate: %f\n",gr,G1,BA );
    printf("number of survivors is %f\n",s/trial);
    fprintf(fp,"number of survivors is %f\n",s/trial);
    printf("lattice size is %d*%d\n",SIZE,SIZE);
    }}
fclose(fp);
}

```
